# Supplementary material for: Mesomorphic silver(i) complexes of 4-alkyloxy-2′-stilbazoles and 4-alkyloxy-3′-stilbazoles. Crystal and molecular structure of 4-methoxy-2′-stilbazole
Source: Royal Society of Chemistry journal article supplement (doi:10.1039/b204820e), 2002-01-01
Supplement: b204820e.doc [file b204820e.doc]

**Electronic Supplementary Information**

**Table**  Bond lengths [Å] and angles [°].

|  |
| --- |

C1O1 1.424(3)

C2O1 1.372(2)

C2C7 1.389(3)

C2C3 1.389(3)

C3C4 1.394(3)

C4C5 1.384(3)

C5C6 1.411(3)

C5C8 1.461(3)

C6C7 1.377(3)

C8C9 1.330(3)

C9C10 1.468(3)

C10N1 1.352(3)

C10C14 1.394(3)

C11N1 1.340(3)

C11C12 1.376(3)

C12C13 1.374(3)

C13C14 1.383(3)

O1C2C7 115.76(17)

O1C2C3 124.31(19)

C7C2C3 119.93(18)

C2C3C4 118.97(19)

C5C4C3 122.32(18)

C4C5C6 117.36(19)

C4C5C8 119.24(18)

C6C5C8 123.39(19)

C7C6C5 121.1(2)

C6C7C2 120.36(18)

C9C8C5 127.71(18)

C8C9C10 124.14(18)

N1C10C14 121.72(19)

N1C10C9 117.62(19)

C14C10C9 120.66(18)

N1C11C12 124.4(2)

C13C12C11 118.1(2)

C12C13C14 119.2(2)

C13C14C10 119.3(2)

C11N1C10 117.20(18)

C2O1C1 117.06(18)

|  |
| --- |

Symmetry transformations used to generate equivalent atoms:

|  |
| --- |
